# Supplementary material for: Chemical Compensation of Mitochondrial Phospholipid Depletion in Yeast and Animal Models of Parkinson’s Disease
Source: PLoS One. 2016 Oct 13;11(10):e0164465. doi: 10.1371/journal.pone.0164465 (PMC5063346; doi:10.1371/journal.pone.0164465)
Supplement: S1 Table — This file contains data from the screening of Prestwick plates 1–7. The values are absorbance at 600 nm. The left column (A1-H1) contains the positive control (ethanolamine). (XLSX) [file pone.0164465.s002.xlsx]

## Sheet: Sheet1
PW1A	1	2	3	4	5	6	7	8	9	10	11	12
A	1.231	0.278	0.259	0.254	0.249	0.24	0.252	0.252	0.252	0.241	0.237	0.222	600
B	1.288	0.287	0.258	0.255	0.25	0.242	0.231	0.246	0.233	0.228	0.228	0.217	600
C	1.285	1.081	0.298	0.283	0.218	0.258	0.262	0.25	0.234	0.247	0.233	0.215	600
D	1.267	0.326	0.304	0.29	0.279	0.268	0.272	0.269	0.259	0.212	0.131	0.22	600
E	1.227	0.293	0.294	0.276	0.234	0.222	0.259	0.266	0.269	0.236	0.232	0.216	600
F	1.28	0.334	0.303	0.295	0.194	0.284	0.274	0.278	0.265	0.239	0.237	0.234	600
G	1.268	0.301	0.272	0.246	0.27	0.24	0.251	0.204	0.251	0.236	0.32	0.233	600
H	1.249	0.264	0.267	0.249	0.258	0.277	0.259	0.25	0.243	0.237	0.241	0.237	600
PW1B	1	2	3	4	5	6	7	8	9	10	11	12
A	1.247	0.307	0.3	0.284	0.281	0.281	0.286	0.28	0.281	0.28	0.272	0.267	600
B	1.178	0.324	0.298	0.289	0.301	0.281	0.281	0.287	0.279	0.271	0.268	0.271	600
C	1.275	1.117	0.306	0.295	0.245	0.279	0.276	0.278	0.263	0.297	0.274	0.259	600
D	1.27	0.331	0.309	0.284	0.282	0.284	0.285	0.292	0.277	0.254	0.134	0.256	600
E	1.264	0.305	0.298	0.283	0.247	0.218	0.278	0.29	0.278	0.273	0.277	0.259	600
F	1.276	0.333	0.302	0.28	0.206	0.278	0.282	0.29	0.279	0.298	0.274	0.262	600
G	1.267	0.315	0.314	0.279	0.291	0.291	0.288	0.23	0.294	0.28	0.367	0.258	600
H	1.251	0.321	0.306	0.29	0.298	0.295	0.292	0.292	0.29	0.28	0.281	0.284	600
PW2A	1	2	3	4	5	6	7	8	9	10	11	12
A	1.21	0.273	0.246	0.248	0.239	0.241	0.244	0.216	0.209	0.223	0.172	0.218	600
B	1.217	0.256	0.236	0.226	0.221	0.208	0.223	0.172	0.188	0.198	0.185	0.235	600
C	1.22	0.272	0.226	0.219	0.215	0.169	0.204	0.201	0.193	0.188	0.18	0.236	600
D	1.221	0.248	0.217	0.237	0.225	0.195	0.217	0.191	0.185	0.186	0.181	0.245	600
E	1.211	0.231	0.2	0.216	0.225	0.181	0.215	0.158	0.182	0.191	0.176	0.22	600
F	1.233	0.233	0.208	0.23	0.228	0.185	0.234	0.192	0.205	0.225	0.202	0.224	600
G	1.216	0.242	0.206	0.18	0.208	0.196	0.209	0.207	0.195	0.211	0.2	0.209	600
H	1.228	0.277	0.289	0.233	0.226	0.227	0.208	0.207	0.24	0.224	0.251	0.205	600
PW2B	1	2	3	4	5	6	7	8	9	10	11	12
A	1.227	0.306	0.264	0.271	0.253	0.256	0.25	0.248	0.246	0.243	0.227	0.246	600
B	1.233	0.27	0.253	0.249	0.241	0.238	0.243	0.219	0.235	0.233	0.186	0.26	600
C	1.238	0.297	0.241	0.243	0.227	0.193	0.227	0.234	0.234	0.218	0.224	0.233	600
D	1.238	0.272	0.236	0.237	0.243	0.233	0.214	0.232	0.221	0.234	0.224	0.23	600
E	1.238	0.265	0.244	0.233	0.224	0.224	0.229	0.195	0.234	0.228	0.221	0.234	600
F	1.239	0.289	0.252	0.258	0.246	0.24	0.241	0.239	0.25	0.25	0.231	0.244	600
G	1.264	0.286	0.245	0.201	0.233	0.238	0.236	0.245	0.242	0.231	0.238	0.234	600
H	1.238	0.278	0.273	0.251	0.257	0.259	0.234	0.242	0.261	0.249	0.252	0.254	600
PW3A	1	2	3	4	5	6	7	8	9	10	11	12
A	1.25	0.245	0.222	0.214	0.225	0.2	0.201	0.228	0.19	0.181	0.176	0.175	600
B	1.289	0.371	0.234	0.234	0.233	0.199	0.215	0.229	0.226	0.217	0.2	0.177	600
C	1.285	0.267	0.24	0.231	0.243	0.23	0.236	0.215	0.217	0.212	0.194	0.178	600
D	1.281	0.268	0.235	0.227	0.215	0.219	0.22	0.22	0.228	0.237	0.181	0.183	600
E	1.279	0.262	0.184	0.176	0.208	0.163	0.173	0.218	0.242	0.234	0.203	0.176	600
F	1.285	0.204	0.248	0.239	0.202	0.233	0.231	0.278	0.241	0.229	0.217	0.188	600
G	1.274	0.252	0.115	0.213	0.201	0.199	0.199	0.227	0.206	0.212	0.206	0.178	600
H	1.271	0.244	0.258	0.196	0.209	0.234	0.23	0.212	0.249	0.219	0.279	0.186	600
PW3B	1	2	3	4	5	6	7	8	9	10	11	12
A	1.228	0.262	0.253	0.236	0.223	0.246	0.237	0.265	0.236	0.228	0.237	0.21	600
B	1.286	0.277	0.252	0.243	0.242	0.236	0.239	0.235	0.237	0.253	0.249	0.218	600
C	1.289	0.275	0.254	0.242	0.239	0.247	0.233	0.227	0.234	0.244	0.232	0.207	600
D	1.275	0.27	0.253	0.262	0.266	0.25	0.239	0.243	0.234	0.242	0.202	0.208	600
E	1.279	0.268	0.203	0.216	0.257	0.186	0.198	0.243	0.242	0.245	0.228	0.208	600
F	1.281	0.219	0.26	0.248	0.215	0.253	0.24	0.291	0.25	0.231	0.231	0.208	600
G	1.265	0.285	0.133	0.241	0.236	0.248	0.218	0.239	0.235	0.247	0.236	0.206	600
H	1.263	0.268	0.233	0.209	0.216	0.238	0.249	0.248	0.241	0.231	0.246	0.206	600
PW4A	1	2	3	4	5	6	7	8	9	10	11	12
A	1.256	0.272	0.25	0.216	0.227	0.214	0.227	0.213	0.235	0.223	0.212	0.215	600
B	1.291	0.259	0.248	0.205	0.241	0.213	0.221	0.228	0.221	0.193	0.205	0.233	600
C	1.289	0.236	0.254	0.251	0.252	0.242	0.235	0.242	0.213	0.229	0.221	0.216	600
D	1.279	0.257	0.239	0.27	0.265	0.264	0.24	0.249	0.241	0.219	0.207	0.194	600
E	1.277	0.248	0.239	0.254	0.257	0.209	0.249	0.252	0.237	0.222	0.219	0.185	600
F	1.283	0.246	0.23	0.237	0.245	0.254	0.249	0.226	0.219	0.226	0.231	0.21	600
G	1.266	0.265	0.249	0.235	0.228	0.236	0.229	0.224	0.233	0.221	0.208	0.19	600
H	1.261	0.249	0.236	0.223	0.225	0.222	0.246	0.243	0.232	0.22	0.233	0.213	600
PW4B	1	2	3	4	5	6	7	8	9	10	11	12
A	1.227	0.259	0.233	0.233	0.223	0.236	0.232	0.215	0.225	0.226	0.214	0.205	600
B	1.298	0.259	0.26	0.206	0.243	0.218	0.234	0.229	0.225	0.209	0.215	0.201	600
C	1.28	0.244	0.251	0.243	0.246	0.244	0.275	0.239	0.228	0.233	0.239	0.207	600
D	1.278	0.275	0.237	0.25	0.27	0.255	0.242	0.232	0.243	0.231	0.223	0.197	600
E	1.274	0.271	0.248	0.256	0.251	0.209	0.246	0.242	0.234	0.229	0.226	0.204	600
F	1.28	0.285	0.259	0.246	0.246	0.244	0.24	0.234	0.233	0.261	0.24	0.198	600
G	1.269	0.26	0.242	0.221	0.233	0.23	0.232	0.217	0.222	0.23	0.216	0.196	600
H	1.27	0.29	0.261	0.227	0.224	0.246	0.229	0.229	0.22	0.225	0.229	0.208	600
PW5A	1	2	3	4	5	6	7	8	9	10	11	12
A	1.23	0.26	0.259	0.244	0.252	0.235	0.234	0.229	0.198	0.222	0.235	0.199	600
B	1.283	0.271	0.248	0.23	0.232	0.219	0.232	0.242	0.218	0.229	0.211	0.27	600
C	1.279	0.257	0.247	0.237	0.229	0.228	0.24	0.227	0.235	0.237	0.23	0.202	600
D	1.271	0.261	0.257	0.228	0.226	0.233	0.221	0.234	0.234	0.224	0.231	0.198	600
E	1.26	0.249	0.245	0.235	0.215	0.221	0.217	0.232	0.224	0.204	0.125	0.204	600
F	1.271	0.28	0.237	0.22	0.229	0.251	0.211	0.225	0.248	0.242	0.242	0.211	600
G	1.263	0.274	0.233	0.242	0.231	0.258	0.224	0.234	0.195	0.267	0.217	0.209	600
H	1.267	0.27	0.252	0.236	0.217	0.222	0.222	0.237	0.204	0.207	0.215	0.211	600
PW5B	1	2	3	4	5	6	7	8	9	10	11	12
A	1.261	0.261	0.242	0.221	0.206	0.205	0.191	0.183	0.172	0.187	0.201	0.181	600
B	1.288	0.272	0.231	0.212	0.212	0.201	0.208	0.211	0.195	0.194	0.19	0.166	600
C	1.284	0.258	0.223	0.23	0.22	0.207	0.207	0.21	0.201	0.207	0.17	0.163	600
D	1.272	0.246	0.135	0.229	0.227	0.219	0.221	0.202	0.211	0.194	0.174	0.149	600
E	1.279	0.24	0.244	0.233	0.246	0.234	0.23	0.234	0.21	0.173	0.122	0.145	600
F	1.282	0.273	0.226	0.219	0.219	0.227	0.193	0.203	0.223	0.213	0.189	0.142	600
G	1.281	0.266	0.236	0.227	0.202	0.248	0.222	0.201	0.174	0.248	0.172	0.167	600
H	1.282	0.278	0.249	0.227	0.221	0.226	0.237	0.214	0.194	0.207	0.224	0.196	600
PW6A	1	2	3	4	5	6	7	8	9	10	11	12
A	1.26	0.204	0.218	0.213	0.225	0.227	0.227	0.23	0.154	0.203	0.212	0.197	600
B	1.295	0.18	0.218	0.21	0.209	0.219	0.222	0.21	0.222	0.227	0.225	0.208	600
C	1.292	0.265	0.23	0.225	0.233	0.213	0.22	0.219	0.212	0.235	0.218	0.195	600
D	1.289	0.254	0.228	0.226	0.227	0.348	0.216	0.21	0.261	0.235	0.163	0.202	600
E	1.291	0.202	0.206	0.233	0.226	0.232	0.222	0.227	0.221	0.218	0.211	0.186	600
F	1.298	0.236	0.243	0.241	0.235	0.224	0.206	0.234	0.232	0.156	0.218	0.194	600
G	1.28	0.234	0.205	0.218	0.278	0.211	0.203	0.212	0.214	0.195	0.198	0.19	600
H	1.283	0.22	0.218	0.207	0.197	0.196	0.223	0.186	0.175	0.198	0.217	0.204	600
PW6B	1	2	3	4	5	6	7	8	9	10	11	12
A	1.26	0.184	0.229	0.204	0.224	0.229	0.222	0.217	0.145	0.203	0.214	0.193	600
B	1.301	0.176	0.228	0.22	0.22	0.236	0.224	0.211	0.225	0.219	0.227	0.216	600
C	1.302	0.244	0.217	0.232	0.25	0.243	0.242	0.233	0.23	0.228	0.218	0.195	600
D	1.294	0.232	0.239	0.273	0.27	0.38	0.262	0.261	0.335	0.241	0.161	0.207	600
E	1.291	0.201	0.216	0.271	0.264	0.275	0.257	0.275	0.241	0.216	0.214	0.2	600
F	1.29	0.254	0.242	0.235	0.242	0.26	0.274	0.258	0.228	0.16	0.206	0.209	600
G	1.27	0.262	0.235	0.237	0.211	0.227	0.211	0.221	0.221	0.202	0.213	0.209	600
H	1.272	0.245	0.23	0.217	0.202	0.214	0.229	0.201	0.194	0.213	0.229	0.212	600
PW7A	1	2	3	4	5	6	7	8	9	10	11	12
A	1.24	0.273	0.267	0.259	0.243	0.245	0.237	0.247	0.227	0.233	0.22	0.205	600
B	1.272	0.297	0.263	0.268	0.255	0.237	0.24	0.263	0.157	0.245	0.228	0.221	600
C	1.292	0.297	0.293	0.295	0.284	0.266	0.278	0.274	0.25	0.25	0.244	0.216	600
D	1.262	0.292	0.304	0.3	0.323	0.304	0.284	0.275	0.264	0.268	0.235	0.234	600
E	1.285	0.299	0.331	0.296	0.274	0.302	0.259	0.263	0.272	0.249	0.246	0.225	600
F	1.289	0.301	0.296	0.3	0.24	0.256	0.256	0.269	0.252	0.26	0.238	0.245	600
G	1.277	0.142	0.259	0.283	0.261	0.258	0.232	0.267	0.26	0.254	0.167	0.22	600
H	1.272	0.303	0.269	0.223	0.242	0.232	0.274	0.253	0.251	0.241	0.232	0.222	600
PW7B	1	2	3	4	5	6	7	8	9	10	11	12
A	1.259	0.258	0.225	0.19	0.22	0.199	0.188	0.211	0.181	0.203	0.245	0.173	600
B	1.297	0.251	0.219	0.212	0.199	0.199	0.196	0.203	0.129	0.19	0.192	0.183	600
C	1.3	0.271	0.232	0.224	0.223	0.218	0.213	0.211	0.208	0.202	0.188	0.179	600
D	1.284	0.259	0.249	0.242	0.263	0.254	0.275	0.231	0.212	0.202	0.191	0.177	600
E	1.287	0.241	0.257	0.248	0.266	0.254	0.253	0.241	0.219	0.204	0.191	0.185	600
F	1.29	0.277	0.253	0.237	0.213	0.231	0.227	0.229	0.216	0.22	0.205	0.195	600
G	1.276	0.119	0.214	0.235	0.222	0.222	0.19	0.221	0.216	0.203	0.117	0.187	600
H	1.26	0.233	0.225	0.184	0.21	0.216	0.262	0.216	0.204	0.207	0.223	0.193	600
